# Supplementary material for: COVID-19 Serum Drives Spike-Mediated SARS-CoV-2 Variation
Source: MDPI journal article supplement (doi:10.3390/v16050763), 2024-05-11
Supplement: s1 [file s1]

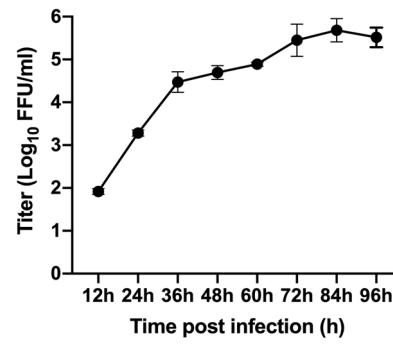

**Figure S1.** Growth kinetics of the rVSV/SARS-CoV-2/GFP viruses in Vero cells at a multiplicity of infection (MOI) of 0.1. Viral titers were quantified using a focus-forming assay and are expressed as focus-forming units per milliliter (FFU/ml). Error bars represent the standard deviation of the mean (n=3).

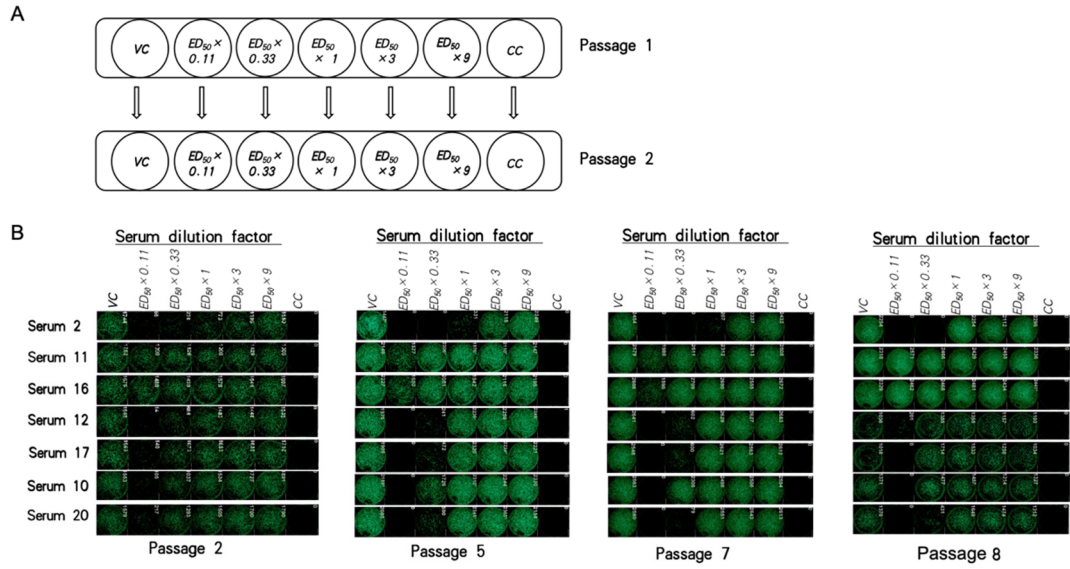

**Figure S2.** Selection of SARS-CoV-2 spike (S) protein escape mutants. **(A)** Schematic representation of the 96-well plate format used for selecting SARS-CoV-2 escape mutants with convalescent serum obtained from patients who had recovered from SARS-CoV-2 (Wuhan-Hu-1) infections. **(B)** Quantification of GFP-positive cells at various passages and serum dilution factors using ELISPOT. VC virus control, CC cell control,  $ED_{50}$  50% effective dilution.

**Table S1.** Overview of characteristics in COVID-19 convalescent sera and dominant viral variants identified within convalescent serum samples.

| Serum ID | Neutralization ED <sub>50</sub> | Binding titer |      | Dominant viral variant (DV)                |
|----------|---------------------------------|---------------|------|--------------------------------------------|
|          |                                 | RBD           | S2   |                                            |
| 2        | 69                              | 160           | 640  | DV2 (R78Q/E484D/R685Q/L1265R/H1271Y)       |
| 11       | 38                              | 40            | 320  | DV1 (R78Q/R685Q/L1265R/H1271Y)             |
| 16       | 43                              | 160           | 1280 | DV1 (R78Q/R685Q/L1265R/H1271Y)             |
| 12       | 322                             | 1280          | 1280 | DV2 (R78Q/E484D/R685Q/L1265R/H1271Y)       |
| 17       | 286                             | 640           | 320  | DV3 (R78Q/D215A/R685Q/P812L/L1265R/H1271Y) |
| 10       | 435                             | 640           | 640  | DV4 (R78Q/R685Q/S813I/L1265R/H1271Y)       |
| 20       | 492                             | ≥2560         | 640  | DV1 (R78Q/R685Q/L1265R/H1271Y)             |

ED<sub>50</sub> 50% effective dilution, RBD receptor binding domain, S spike.
